# Supplementary material for: Long-range linear elasticity and mechanical instability of self-scrolling binormal nanohelices under a uniaxial load
Source: Royal Society of Chemistry journal article supplement (doi:10.1039/c1nr10650c), 2011-01-01
Supplement: c1nr10650c.pdf [file c1nr10650c.pdf]

Electronic Supplementary Information (ESI)

**Long-range Linear Elasticity and Mechanical Instability of Self-scrolling  
Binormal Nanohelices under Uniaxial Load**

*Lu Dai*<sup>1</sup>, *Li Zhang*<sup>2,\*</sup>, *Lixin Dong*<sup>2,†</sup>, *Wenzhong Shen*<sup>3,\*</sup>, *Xiaobin Zhang*<sup>4</sup>, *Zhizhen Ye*<sup>4</sup>, and  
*Bradley J. Nelson*<sup>2</sup>

<sup>1</sup>School of Mathematics and Physics, Suzhou University of Science and Technology,  
Suzhou 215011, P.R. China

<sup>2</sup>Institute of Robotics and Intelligent Systems, ETH Zurich, CH-8092 Zurich, Switzerland

<sup>3</sup>Laboratory of Condensed Matter Spectroscopy and Opto-Electronic Physics, and Key  
Laboratory of Artificial Structures and Quantum Control (Ministry of Education),  
Department of Physics, Shanghai Jiao Tong University, Shanghai 200240, P.R. China

<sup>4</sup>State Key Laboratory of Silicon Materials, Department of Materials Science and Engineering,  
Zhejiang University, Hangzhou 310027, P.R. China

---

\* To whom correspondence should be addressed. E-mail: [lizhang@ethz.ch](mailto:lizhang@ethz.ch) and [wzshen@sjtu.edu.cn](mailto:wzshen@sjtu.edu.cn)

† Current address: Department of Electrical & Computer Engineering, Michigan State University, East Lansing, MI-48824, USA

A Cosserat curve, i.e., a directed curve with an orthonormal triad of directors and specified by four vector fields, follows the basic equilibrium equations [1]:

$$\hat{\tau}_\alpha - \varepsilon_{\alpha\beta\gamma} \tau_\beta W_\gamma = 0, \quad (\text{S1a})$$

$$\hat{m}_\alpha - \varepsilon_{\alpha\beta\gamma} (m_\beta W_\gamma + \tau_\beta y_\gamma) = 0 \quad (\text{S1b})$$

where  $\tau$  and  $m$  are the total force and torque across the cross section of the curve, respectively;  $\varepsilon$  is the permutation tensor,  $W$  and  $y$  are the director and position deformation measures, respectively. The Greek subscripts  $\alpha, \beta, \gamma$  take on the values 1, 2, 3.  $\hat{() = \partial/\partial S = \lambda \dot{() = \lambda \partial/\partial s}$ , and  $\lambda = \partial s/\partial S$  is the stretch of the curve with  $S$  the arc length along a fixed reference configuration and  $s$  the one along a deformed configuration [2, 3].

As presented in Figure 2(e-f) of the paper, two types of helices with a rectangular cross section are considered, they are named normal and binormal helices, respectively [4, 5]. Assuming that a helix  $H_I$  with the radius  $a_0$ , pitch  $b_0$ , length  $l_0$  and number of turns  $N$  is curled from a nanobelt with a width of  $w$  and a thickness of  $t$  ( $w > t$ ), when a tensile force  $F$  is exerted along the helical axis, the helix is elongated with a length of  $L$  and it is deformed to a new helical shape  $H_F$ , i.e. a radius  $a$ , a pitch  $b$  and a length  $l$ , simultaneously. Therefore, in the model  $H_I$  is the fixed reference configuration and  $H_F$  is the deformed one, whose director basis  $\mathbf{D}_i$  ( $i=1,2,3$ ) and  $\mathbf{d}_i$  are defined by a set of Euler angles  $\phi_0, \theta_0, \psi_0$  and  $\phi, \theta, \psi$ , respectively. For the configuration of helix,  $\phi_0, \theta_0, \dot{\psi}_0, \phi, \theta, \hat{\psi}$  are all constants [6]. We choose the third director  $\mathbf{D}_3$  of  $H_I$  along the tangent to the centerline of the helical ribbon axis, and the force  $F$  along the  $\mathbf{e}_3$  axis of the fixed Cartesian basis.  $\mathbf{D}_1, \mathbf{D}_2$  and  $\mathbf{d}_1, \mathbf{d}_2$  are assumed to be along the direction of the largest and smallest bending stiffness of the cross section in  $H_I$  and  $H_F$ , respectively.

The director deformation measures  $W^{(0)}$  of  $H_I$  for a normal and a binormal helix are given by

$$W_{1N}^{(0)} = -\dot{\psi}_0 \sin \theta_0, W_{2N}^{(0)} = 0, W_{3N}^{(0)} = \dot{\psi}_0 \cos \theta_0. \quad (\text{S2a})$$

$$W_{1B}^{(0)} = 0, W_{2B}^{(0)} = \dot{\psi}_0 \sin \theta_0, W_{3B}^{(0)} = \dot{\psi}_0 \cos \theta_0. \quad (\text{S2b})$$

respectively. We use  $W$ , director deformation measures for  $H_F$ , in the equilibrium equation Eq. (S1b) and obtain:

$$(A - C)W_{1N}W_{3N} - AW_{1N}^{(0)}W_{3N} + CW_{3N}^{(0)}W_{1N} + (E_1 - E_3)y_{1N}y_{3N} + E_3y_{1N} = 0, \quad (\text{S3a})$$

$$W_{2N} \left[ -A(W_{1N} - W_{1N}^{(0)}) + BW_{1N} \right] = 0, \quad (\text{S3b})$$

for a normal helix, and

$$(B - C)W_{2B}W_{3B} - BW_{2B}^{(0)}W_{3B} + CW_{3B}^{(0)}W_{2B} + (E_2 - E_3)y_{2B}y_{3B} + E_3y_{2B} = 0, \quad (\text{S4a})$$

$$W_{1B} \left[ -AW_{2B} + B(W_{2B} - W_{2B}^{(0)}) \right] = 0, \quad (\text{S4b})$$

for a binormal helix, where  $E_1 = E_2 = K G t w$ ,  $E_3 = E t w$ ,  $A = E I_1$ ,  $B = E I_2$ , and  $C = 4 G I_1 I_2 / (I_1 + I_2)$  according to the scaled torsional stiffness [7].  $K$  is the Timoshenko shear coefficient which is related to the Poisson's ratio  $\nu$  through  $K = (5 + 5\nu) / (6 + 5\nu)$  [8].  $E$  and  $G = E / 2(1 + \nu)$  are the Young's and shear moduli of the nanobelt, respectively.  $I_1 = w^3 t / 12$  and  $I_2 = w t^3 / 12$  are the moment of inertia.

Since the shape of  $H_F$  is determined by the applied force, Eqs. (S3b) and (S4b) indicate that for a helical solution, the director deformation measures  $W$  have the form of:

$$W_{1N} = -\hat{\psi} \sin \theta, W_{2N} = 0, W_{3N} = \hat{\psi} \cos \theta \quad (\text{S5a})$$

for a normal helix, and

$$W_{1B} = 0, W_{2B} = \hat{\psi} \sin \theta, W_{3B} = \hat{\psi} \cos \theta \quad (\text{S5b})$$

for a binormal helix. The relation  $\hat{\psi} = \dot{\psi}_0$  is derived from  $\hat{\psi} = \lambda / \sqrt{a^2 + b^2}$  [1]. The position vectors obtained from Eq. (1a) of  $H_F$  are expressed by:

$$y_{1N} = -\frac{F}{E_1} \sin \theta, y_{2N} = 0, y_{3N} = \frac{F}{E_3} \cos \theta + 1, \quad (\text{S6a})$$

for a normal helix; and

$$y_{1B} = 0, y_{2B} = \frac{F}{E_2} \sin \theta, y_{3B} = \frac{F}{E_3} \cos \theta + 1, \quad (\text{S6b})$$

for a binormal helix. From Eq. (S6), the stretch  $\lambda$  is obtained by:

$$\lambda = \sqrt{\frac{F^2}{E_1^2} \sin^2 \theta + \left( \frac{F}{E_3} \cos \theta + 1 \right)^2}, \quad (\text{S7})$$

as well as the radius and pitch of  $H_1$  and  $H_F$  in terms of the Euler angles for both normal and binormal helices :

$$a_0 = \frac{\sin \theta_0}{\dot{\psi}_0}, \quad b_0 = \frac{2\pi \cos \theta_0}{\dot{\psi}_0}, \quad (\text{S8a})$$

$$a = \frac{1}{\dot{\psi}_0} \left[ \left( \frac{F}{E_3} \cos \theta + 1 \right) - \frac{F}{E_1} \cos \theta \right] \sin \theta, \quad b = \frac{2\pi}{\dot{\psi}_0} \left[ \frac{F}{E_1} \sin^2 \theta + \left( \frac{F}{E_3} \cos \theta + 1 \right) \cos \theta \right] \quad (\text{S8b})$$

By combination of Eq. (6) and the result of  $W_\alpha^{(0)}$ ,  $W_\alpha$ ,  $\psi = \psi_0$ , Eq. (3a) and (4a) are given by:

$$\begin{aligned} & \left( \frac{1}{E_3} - \frac{1}{E_1} \right) \cos \theta \sin \theta F^2 + \sin \theta F - C \dot{\psi}_0^2 (\cos \theta - \cos \theta_0) \sin \theta \\ & + EI_1 [1 - (\Delta - 1) \delta_{i2}] \dot{\psi}_0^2 (\sin \theta - \sin \theta_0) \cos \theta = 0 \end{aligned} \quad (\text{S9})$$

where  $\Delta \equiv I_2/I_1$ ,  $i = 1$  (or  $i = 2$ ) for a normal (or binormal) helix and  $\delta_{i2}$  is the Kronecker delta.

Furthermore, the torque ( $M$ ) along the same direction as that of the force  $F$  is expressed by:

$$M = EI_1 [1 - (\Delta - 1) \delta_{i2}] \dot{\psi}_0 (\sin \theta - \sin \theta_0) \sin \theta + C \dot{\psi}_0 (\cos \theta - \cos \theta_0) \cos \theta \quad (\text{S10})$$

The spring constant  $k$  of  $H_F$  is deduced from Eqs. (S8) and (S9) according to the Hooke's law  $k = dF/dL$ :

$$k = - \frac{P_1 P_4}{N (P_3 P_4 + P_2)},$$

where  $P_1 \equiv \left[ \dot{\psi} / 2\pi \right] / \left[ 1 + 2F \cos \theta \left( \frac{1}{E_3} - \frac{1}{E_1} \right) \right]$ ,

$$\begin{aligned}
 P_2 &\equiv 2\left(\frac{1}{E_3} - \frac{1}{E_1}\right)\cos\theta\sin\theta F + \sin\theta, \\
 P_3 &\equiv -\left[\frac{1}{E_1} + \left(\frac{1}{E_3} - \frac{1}{E_1}\right)\cos^2\theta\right] / \left[1 + 2F\cos\theta\left(\frac{1}{E_3} - \frac{1}{E_1}\right)\right], \\
 P_4 &\equiv \left(\frac{1}{E_3} - \frac{1}{E_1}\right)\frac{1-2\cos^2\theta}{\sin\theta}F^2 - \frac{\cos\theta}{\sin\theta}F + \dot{\psi}_0^2\{EI_1[1-(\Delta-1)\delta_{i2}] - C\}\frac{1-2\cos^2\theta}{\sin\theta} \\
 &\quad - EI_1[1-(\Delta-1)\delta_{i2}]\dot{\psi}_0^2\sin\theta - C\dot{\psi}_0^2\cos\theta\frac{\cos\theta}{\sin\theta}
 \end{aligned}
 \tag{S11}$$

By measuring the geometry parameters  $a_0$ ,  $b_0$ ,  $t$ ,  $w$ ,  $N$  of the helix  $H_1$  in its initial shape and the applied force  $F$  or torque  $M$ , Eqs. (S7-S11) can be used to calculate the radius  $a$ , pitch  $b$ , and the spring constant  $k$  of  $H_F$  with the conservation of length  $l = \lambda l_0$ , where  $l_0 = N\sqrt{(2\pi a_0)^2 + b_0^2}$  and  $l = N\sqrt{(2\pi a)^2 + b^2}$  are the unwound length of the nanobelt after and before loading, respectively. We note that the shear deformation and extension have been taken into account in the Cosserat curve model.

## References:

1. A. B. Whitman, C. N. DeSilva, *J. Elasticity* **1974**, *4*, 265.
2. L. Dai, W. Z. Shen, *Nanotechnology* **2009**, *20*, 465707.
3. L. Dai, W. Z. Shen, *J. Appl. Phys.* **2009**, *106*, 114314.
4. A. F. Fonseca, C. P. Malta, D. S. Galvao, *Nanotechnology* **2006**, *17*, 5620.
5. A. Goriely, P. Shipman, *Phys. Rev. E* **2000**, *61*, 4508.
6. Z. Zhou, P.Y. Lai, B. Joos, *Phys. Rev. E* **2005**, *71*, 052801.
7. A. E. H. Love, *A Treatise on the Mathematical Theory of Elasticity*; Cambridge University Press: Cambridge, **1982**.
8. W. A. Fate, High temperature elastic moduli of polycrystalline silicon nitride. *J. Appl. Phys.* **1975**, *46*, 2375.

## ***Nomenclature***

$\tau(N)$ : the total force across the cross section of the curve.

$m(N\ m)$ : the total torque across the cross section of the curve.

$\varepsilon$ : permutation tensor.

$W$ : director deformation measures.

$y(m)$ : position deformation measures.

$\alpha, \beta, \gamma$ : Greek subscripts.

$S(m)$ : arc length along a fixed reference configuration.

$s(m)$ : arc length along a deformed configuration.

$\lambda$ : stretch of the curve.

$H_I$ : helix before loading.

$a_0(m)$ : radius of helix  $H_I$ .

$b_0(m)$ : pitch of helix  $H_I$ .

$l_0(m)$ : length of helix  $H_I$ .

$N$ : number of turns of helix.

$w(m)$ : width of nanobelt.

$t(m)$ : thickness of nanobelt.

$F(N)$ : loading force along the helical axis.

$H_F$ : helix after loading.

$L(m)$ : elongated length of helix.

$a(m)$ : radius of helix  $H_F$ .

$b(m)$ : pitch of helix  $H_F$ .

$l(m)$ : length of helix  $H_F$ .

$D_i(i=1,2,3)$ : director basis of helix  $H_I$  along three orthonormal basis of fixed rectangular Cartesian coordinate system.

$d_i(i=1,2,3)$ : director basis of helix  $H_I$  along three orthonormal basis of fixed rectangular Cartesian coordinate system.

$\phi_0, \theta_0, \psi_0$ (rad): set of Euler angles defining director basis  $\mathbf{D}_i$ .

$\phi, \theta, \psi$ (rad): set of Euler angles defining director basis  $\mathbf{d}_i$ .

$W_{iN}^{(0)}, W_{iB}^{(0)}$  (i=1,2,3): director deformation measures of  $H_I$  along three orthonormal basis of fixed rectangular Cartesian coordinate system for a normal helix and a binormal helix, respectively.

$W_{iN}, W_{iB}$  (i=1,2,3): director deformation measures of  $H_F$  along three orthonormal basis of fixed rectangular Cartesian coordinate system for a normal helix and a binormal helix, respectively.

$E_i, A, B, C, P_j$  (i=1,2,3; j=1,2,3,4): Intermediate parameters.

$E$ (Pa): Young's modulus of the nanobelt.

$G$ (Pa): shear modulus of the nanobelt.

$\nu$ : Poisson's ratio.

$I_1, I_2$ (m<sup>4</sup>): moment of inertia.

$y_{iN}, y_{iB}$  (i=1,2,3)(m): position deformation measures of  $H_F$  along three orthonormal basis of fixed rectangular Cartesian coordinate system for a normal helix and a binormal helix, respectively.

$\delta_{i2}$  : Kronecker delta.

$M$ (N m): torque along the helical axis.

$k$ (N/m): spring constant of  $H_F$ .

$\nu_{\text{SiGe}}$ : Poisson's ratio of SiGe.

$\nu_{\text{Si}}$ : Poisson's ratio of Si.

$\nu_{\text{Cr}}$ : Poisson's ratio of Cr.

$x$ (m): distance between two adjacent exposed edges of the nanobelt along its width direction.

$\Delta L_S$ (m): relative stretch of nanobelt.

$F_{cr}$  (N): critical compressive load causing buckling.

$l_{cr}$  (m): critical length of helix before buckling.

$\Delta_{cr}$  (m): critical decrease of length of helix before buckling.

$\xi$  (rad): pitch angle.

$\alpha_0$  (N m<sup>2</sup>): bending rigidity of the nanohelix.

$s_0$  (m): length of nanobelt.
